# Supplementary material for: Sex-Specific Difference in the Effect of Altitude on Sleep and Nocturnal Breathing in Young Healthy Volunteers
Source: MDPI journal article supplement (doi:10.3390/jcm11102869), 2022-05-19
Supplement: s1 [file s1]

**Sex-specific difference in the effect of altitude on sleep and nocturnal breathing  
in young healthy volunteers**

**(Supplemental material)**

Taomei Li<sup>1,†</sup>, Lu Tan<sup>1,†</sup>, Michael Furian<sup>2</sup>, Yanyan Zhang<sup>1</sup>, Lian Luo<sup>1</sup>, Fei Lei<sup>1</sup>,  
Xiaofang Xue<sup>3</sup>, Jiaming He<sup>3</sup>, Xiangdong Tang<sup>1,\*</sup>

1 Sleep Medicine Center, Mental Health Center, Department of Respiratory and Critical Care Medicine, State Key Laboratory of Biotherapy, West China Hospital, Sichuan University, 610041 Chengdu, China

2 Sleep Disorders Center, Department of Respiratory Medicine, University Hospital of Zurich, 8091 Zurich, Switzerland

3 Department of Cardiology, Diqing Tibetan Autonomous Prefectural People's Hospital, 674400 Shangri-La, China

**† These authors make equal contributions to this study.**

**\* Corresponding Author:**

Xiangdong Tang

Sleep Medicine Center, West China Hospital, Sichuan University

28 Dian Xin Nan Jie, Chengdu, Sichuan 610041, China

Tel: 86-28-85422733

Fax: 86-28-85422632

Email: 2372564613@qq.com/ tangxiangdong@scu.edu.cn

Table S1 Sleep parameters in men and women at 500 m and 3270 m

|                            | Men                  |                                |                                |                   | Women                |                                |                                |                   |
|----------------------------|----------------------|--------------------------------|--------------------------------|-------------------|----------------------|--------------------------------|--------------------------------|-------------------|
|                            | 500 m                | 3270 m 1 <sup>st</sup> night   | 3270 m 2 <sup>nd</sup> night   | ANOVA,<br>P value | 500 m                | 3270 m 1 <sup>st</sup> night   | 3270 m 2 <sup>nd</sup> night   | ANOVA,<br>P value |
| <b>Objective sleep</b>     |                      |                                |                                |                   |                      |                                |                                |                   |
| Sleep latency, min         | 7.8 (4.0, 26.3)      | 7.3 (3.0, 15.8)                | 5.8 (3.8, 8.9)                 | 0.500             | 13.0 (6.8, 21.4)     | 9.5 (5.3, 15.5)                | 9.8 (5.1, 18.4)                | 0.229             |
| TST, min                   | 426.9 (393.9, 468.0) | 418.5 (368.8, 458.6)           | 449.5 (400.3, 457.4)           | 0.407             | 427.3 (359.3, 460.7) | 441.5 (396.0, 465.9)           | 451.8 (426.3, 473.0)           | 0.269             |
| NREM 1, %                  | 14.1 (11.2, 17.0)    | 19.3 (13.6, 20.3)              | 12.9 (9.9, 15.8)               | 0.058             | 10.7 (8.3, 17.2)     | 13.1 (8.6, 17.6)               | 10.4 (7.4, 12.4)               | 0.444             |
| NREM 2, %                  | 50.3 (48.1, 53.1)    | 48.9 (41.7, 51.1)              | 49.2 (44.3, 50.7)              | 0.301             | 49.5 (45.1, 58.6)    | 49.0 (44.5, 54.0)              | 48.7 (45.0, 53.8)              | 0.444             |
| NREM 3, %                  | 14.5 (11.3, 15.5)    | 16.1 (10.3, 19.1)              | 16.0 (13.5, 17.6)              | 0.407             | 13.9 (11.0, 17.5)    | 15.4 (13.9, 21.7)              | 16.4 (13.7, 17.9)              | 0.032             |
| REM, %                     | 22.8 (15.2, 25.4)    | 20.5 (13.9, 22.6)              | 23.4 (17.1, 28.0)              | 0.045             | 22.6 (16.6, 25.3)    | 21.8 (16.7, 23.4)              | 24.2 (20.9, 26.9)              | 0.068             |
| WASO, min                  | 30.4 (21.8, 56.6)    | 34.0 (18.5, 81.6)              | 33.3 (23.8, 50.3)              | 0.836             | 22.5 (10.9, 48.1)    | 40.5 (10.1, 70.6)              | 26.0 (13.6, 42.1)              | 0.174             |
| Sleep efficiency, %        | 87.8 (86.8, 94.6)    | 90.8 (80.5, 93.8)              | 91.8 (88.4, 93.4)              | 0.905             | 90.5 (86.9, 95.1)    | 91.1 (82.7, 96.2)              | 91.2 (88.4, 95.2)              | 0.174             |
| Arousal index, /h          | 10.8 (9.1, 13.8)     | 17.5 (16.1, 20.5) <sup>a</sup> | 14.5 (11.7, 17.0) <sup>b</sup> | 0.014             | 10.3 (7.7, 14.8)     | 13.2 (9.8, 17.3)               | 11.1 (9.4, 14.2)               | 0.405             |
| <b>Subjective sleep</b>    |                      |                                |                                |                   |                      |                                |                                |                   |
| Sleep latency, min         | 35.0 (10.0, 60.0)    | 20.0 (12.5, 30.0)              | 20.0 (12.5, 30.0)              | 0.127             | 30.0 (20.0, 30.0)    | 20.0 (10.0, 30.0)              | 20.0 (10.0, 30.0)              | 0.376             |
| TST, min                   | 405.0 (375.0, 427.5) | 435.0 (397.5, 482.5)           | 435.0 (397.5, 483.0)           | 0.110             | 420.0 (360.0, 425.0) | 430.0 (420.0, 480.0)           | 430.0 (420.0, 480.5)           | 0.767             |
| Arousal, events            | 2.0 (1.0, 3.0)       | 2.5 (1.0, 4.3)                 | 2.5 (1.0, 4.3)                 | 0.368             | 3.0 (1.8, 3.3)       | 2.0 (1.0, 3.0)                 | 2.0 (1.0, 3.0)                 | 0.142             |
| <b>Heart rate</b>          |                      |                                |                                |                   |                      |                                |                                |                   |
| NREM heart rate, beats/min | 60.7 (56.8, 67.5)    | 77.1 (72.3, 88.3) <sup>a</sup> | 78.6 (73.4, 86.9) <sup>a</sup> | 0.007             | 58.5 (43.8, 63.1)    | 75.0 (71.6, 82.0) <sup>a</sup> | 81.2 (75.4, 86.4) <sup>a</sup> | <0.001            |
| REM heart rate, beats/min  | 62.0 (58.9, 68.5)    | 75.0 (71.3, 88.2) <sup>a</sup> | 76.0 (72.9, 86.1) <sup>a</sup> | 0.008             | 60.0 (46.2, 66.8)    | 76.2 (71.9, 82.6) <sup>a</sup> | 78.7 (75.9, 83.2) <sup>a</sup> | <0.001            |

Values represent median (interquartile range). TST, total sleep time; NREM 1-3, non-rapid eye movement sleep stage 1-3; REM, rapid eye movement sleep; WASO, wake time after sleep onset. <sup>a</sup>p < 0.05 comparing with 500 m within the same sex; <sup>b</sup>p < 0.05 comparing with 3270 m 1st night within the same sex.

Table S2. Daytime evaluations in women and men at 500 m and 3270 m

|     | Men   |                            |                            |                   | Women |                            |                            |                   |
|-----|-------|----------------------------|----------------------------|-------------------|-------|----------------------------|----------------------------|-------------------|
|     | 500 m | 3270 m 1 <sup>st</sup> day | 3270 m 2 <sup>nd</sup> day | ANOVA,<br>P value | 500 m | 3270 m 1 <sup>st</sup> day | 3270 m 2 <sup>nd</sup> day | ANOVA,<br>P value |
| AMS |       |                            |                            |                   |       |                            |                            |                   |

|                                        |                                   |                                   |                                  |       |                      |                                   |                                   |        |
|----------------------------------------|-----------------------------------|-----------------------------------|----------------------------------|-------|----------------------|-----------------------------------|-----------------------------------|--------|
| AMS, score                             |                                   | 1.0 (0, 2.8)                      | 0 (0, 0.8)                       |       | 3.0 (0.3, 4.0)       | 1.0 (0, 3)                        |                                   |        |
| AMS, n (%)                             |                                   | 1 (10.0)                          | 1 (10.0)                         |       | 7 (38.9)             | 4 (25.0)                          |                                   |        |
| <b>PVT</b>                             |                                   |                                   |                                  |       |                      |                                   |                                   |        |
| Mean RT, ms                            | 355 (348, 389)                    | 362 (336, 391)                    | 342 (338, 369) <sup>*</sup>      | 0.368 | 353 (338, 370)       | 386 (357, 405) <sup>a</sup>       | 389 (362, 419) <sup>a</sup>       | 0.001  |
| Lapses, events                         | 6.0 (2.0, 9.0)                    | 5.0 (1.5, 7.0)                    | 3.0 (1.0, 4.5) <sup>*</sup>      | 0.163 | 4.5 (1.3, 5.8)       | 6.0 (3.3, 10.0)                   | 7.0 (4.0, 12.0)                   | 0.125  |
| Fastest 10% RT, ms                     | 277 (253, 302)                    | 271 (256, 306)                    | 273 (250, 281) <sup>*</sup>      | 0.565 | 272 (263, 293)       | 284 (274, 306)                    | 293 (273, 310) <sup>a</sup>       | 0.028  |
| Slowest 10% RT, ms                     | 520 (477, 704)                    | 544(465, 688)                     | 502 (459, 571)                   | 0.565 | 501 (462, 537)       | 541 (500, 582)                    | 502 (459, 571)                    | 0.144  |
| <b>Arterial blood analysis</b>         |                                   |                                   |                                  |       |                      |                                   |                                   |        |
| pH                                     | 7.40 (7.39, 7.43)                 | 7.45 (7.44, 7.47) <sup>a</sup>    | 7.46 (7.41, 7.48) <sup>a</sup>   | 0.005 | 7.41 (7.41, 7.42)    | 7.45 (7.43, 7.47) <sup>a</sup>    | 7.47 (7.45, 7.48) <sup>a</sup>    | 0.001  |
| PaCO <sub>2</sub> , mmHg               | 39.2 (35.2, 43.3)                 | 35.5 (33.8, 39.3)                 | 37.0 (33.5, 38.2) <sup>*</sup>   | 0.206 | 35.9 (34.4, 41.0)    | 34.0 (30.0, 38.0)                 | 32.0 (28.5, 32.8) <sup>a b</sup>  | 0.005  |
| PaO <sub>2</sub> , mmHg                | 86.6 (81.6, 94.6)                 | 56.0 (49.0, 60.3) <sup>a*</sup>   | 53.0 (49.5, 59.1) <sup>a*</sup>  | 0.001 | 90.3 (83.1, 95.9)    | 62.0 (55.0, 64.0) <sup>a</sup>    | 60.5 (57.5, 64.8) <sup>a</sup>    | <0.001 |
| HCO <sub>3</sub> <sup>-</sup> , mmol/L | 24.8 (23.9, 26.0) <sup>*</sup>    | 25.1 (23.8, 26.5)                 | 25.1 (23.8, 27.1) <sup>*</sup>   | 0.325 | 22.1 (21.8, 23.5)    | 24.2 (22.6, 25.1)                 | 23.7 (20.5, 24.5)                 | 0.052  |
| SaO <sub>2</sub> , %                   | 97.8 (96.1, 98.0)                 | 90.0 (85.5, 92.0) <sup>a</sup>    | 90.4 (87.5, 91.0) <sup>a*</sup>  | 0.001 | 97.8 (97.0, 98.0)    | 92.0 (88.0, 93.0) <sup>a</sup>    | 92.0 (92.0, 93.8) <sup>a</sup>    | <0.001 |
| <b>Venous blood analysis</b>           |                                   |                                   |                                  |       |                      |                                   |                                   |        |
| Red blood cell, ^10 <sup>12</sup> /L   | 5.2 (5.0, 5.4) <sup>*</sup>       | 5.5 (5.1, 5.7) <sup>*</sup>       | 5.3 (5.2, 5.7) <sup>*</sup>      | 0.895 | 4.5 (4.2, 4.9)       | 4.6 (4.4, 4.7) <sup>a</sup>       | 4.8 (4.5, 5.1) <sup>a</sup>       | 0.012  |
| Hemoglobin, g/L                        | 157.0 (153.0, 162.5) <sup>*</sup> | 162.9 (154.6, 167.0) <sup>*</sup> | 159.0(155.0, 167.0) <sup>*</sup> | 0.955 | 137.5 (132.5, 140.3) | 137.6 (131.7, 142.0)              | 144.5 (134.8, 148.3)              | 0.068  |
| Hematocrit, L/ L                       | 0.45 (0.44, 0.47) <sup>*</sup>    | 0.48 (0.45, 0.50) <sup>a*</sup>   | 0.47 (0.46, 0.51) <sup>a*</sup>  | 0.045 | 0.39 (0.38, 0.41)    | 0.42 (0.39, 0.42) <sup>a</sup>    | 0.43 (0.41, 0.46) <sup>a</sup>    | 0.001  |
| White blood cell, ^10 <sup>9</sup> /L  | 5.5 (4.9, 6.4)                    | 6.9 (5.8, 8.5)                    | 5.6 (5.0, 8.0)                   | 0.102 | 5.6 (4.2, 6.4)       | 6.6 (5.2, 8.4) <sup>a</sup>       | 6.7 (5.1, 7.7) <sup>a</sup>       | <0.001 |
| Platelet, ^10 <sup>9</sup> /L          | 237.0 (206.8, 319.5)              | 244.0 (213.8, 272.8)              | 261.0 (238.0, 312.0)             | 0.396 | 228.5 (174.5, 254.5) | 236.0 (191.8, 261.5) <sup>a</sup> | 237.5 (197.3, 306.5) <sup>a</sup> | 0.017  |

Values represent median (interquartile range). AMS, acute mountain sickness; PVT, psychomotor vigilance test; RT, reaction time. PaCO<sub>2</sub>, partial pressure of carbon dioxide in artery; PaO<sub>2</sub>, partial pressure of oxygen in artery; HCO<sub>3</sub><sup>-</sup>, Bicarbonate Radical; SaO<sub>2</sub>, oxygen saturation in artery. <sup>a</sup>p < 0.05 comparing with 500m within the same sex; <sup>b</sup>p < 0.05 comparing with 3270 m 1st night within the same sex; <sup>\*</sup>p < 0.05 men vs. women at identical altitude and day.

**Table S3 Univariate and multivariate generalized least square regression analysis models investigating predictors for AMS score and PVT**

| AMS severity, defined by the Lake Louise questionnaire      |                        |         |                        |         |
|-------------------------------------------------------------|------------------------|---------|------------------------|---------|
| Independent variables                                       | Univariate analysis    |         | Multivariate analysis  |         |
|                                                             | Coefficient (95% CI)   | P value | Coefficient (95% CI)   | P value |
| Age, years                                                  | -0.02 (-0.34, 0.31)    | 0.923   |                        |         |
| BMI, kg/m <sup>2</sup>                                      | -0.09 (-0.29, 0.10)    | 0.352   |                        |         |
| Sex (women vs. men)                                         | 1.21 (-0.02, 2.45)     | 0.054   | 1.16 (-0.07, 2.38)     | 0.060   |
| AHI, /h                                                     | 0.01(-0.05, 0.04)      | 0.860   |                        |         |
| Central AHI, /h                                             | -0.01 (-0.09, 0.09)    | 0.917   |                        |         |
| Mean oxygen saturation, %                                   | -0.03 (-0.16, -0.10)   | 0.606   |                        |         |
| Total sleep time, min                                       | -0.01 (-0.02, 0.01)    | 0.293   |                        |         |
| Sleep efficiency, %                                         | -0.05 (-0.12, 0.02)    | 0.183   | -0.03 (-0.10, 0.04)    | 0.442   |
| Arousal index, /h                                           | -0.03 (-0.16, 0.10)    | 0.640   |                        |         |
| Days at high altitude (2 <sup>nd</sup> vs.1 <sup>st</sup> ) | -1.00 (-2.21, 0.21)    | 0.101   | -0.89(-2.10, 0.32)     | 0.145   |
| PVT reaction time, 1/ms                                     |                        |         |                        |         |
| Independent variables                                       | Univariate analysis    |         | Multivariate analysis  |         |
|                                                             | Coefficient (95% CI)   | P value | Coefficient (95% CI)   | P value |
| Age, years                                                  | 0.007 (-0.017, 0.030)  | 0.575   |                        |         |
| BMI, kg/m <sup>2</sup>                                      | -0.002 (-0.019, 0.015) | 0.803   |                        |         |
| Sex (men vs. women)                                         | -0.076 (-0.201, 0.049) | 0.198   | -0.078 (-0.200, 0.043) | 0.204   |
| Total sleep time, min                                       | -0.001 (-0.002, 0.001) | 0.208   |                        |         |
| NREM 3, %                                                   | -0.006 (-0.019, 0.007) | 0.340   |                        |         |
| Sleep efficiency, %                                         | -0.001 (-0.011, 0.009) | 0.877   |                        |         |
| Wake time after sleep time, min                             | 0.001 (-0.002, 0.002)  | 0.967   |                        |         |
| Mean oxygen saturation, %                                   | 0.008 (0.001, 0.016)   | 0.029   |                        |         |
| AHI, /h                                                     | -0.003 (-0.007, 0.002) | 0.259   |                        |         |
| Altitude (3270 m vs. 500 m)                                 | 0.143 (0.267, 0.019)   | 0.024   | 0.144(0.021, 0.268)    | 0.023   |
| Days at high altitude (2 <sup>nd</sup> vs.1 <sup>st</sup> ) | -0.052 (-0.182, 0.077) | 0.422   |                        |         |

AMS, acute mountain sickness; PVT, psychomotor vigilance test; BMI, body mass index; NREM 3, non-rapid eye movement sleep stage 3; AHI, apnea hypopnea index.

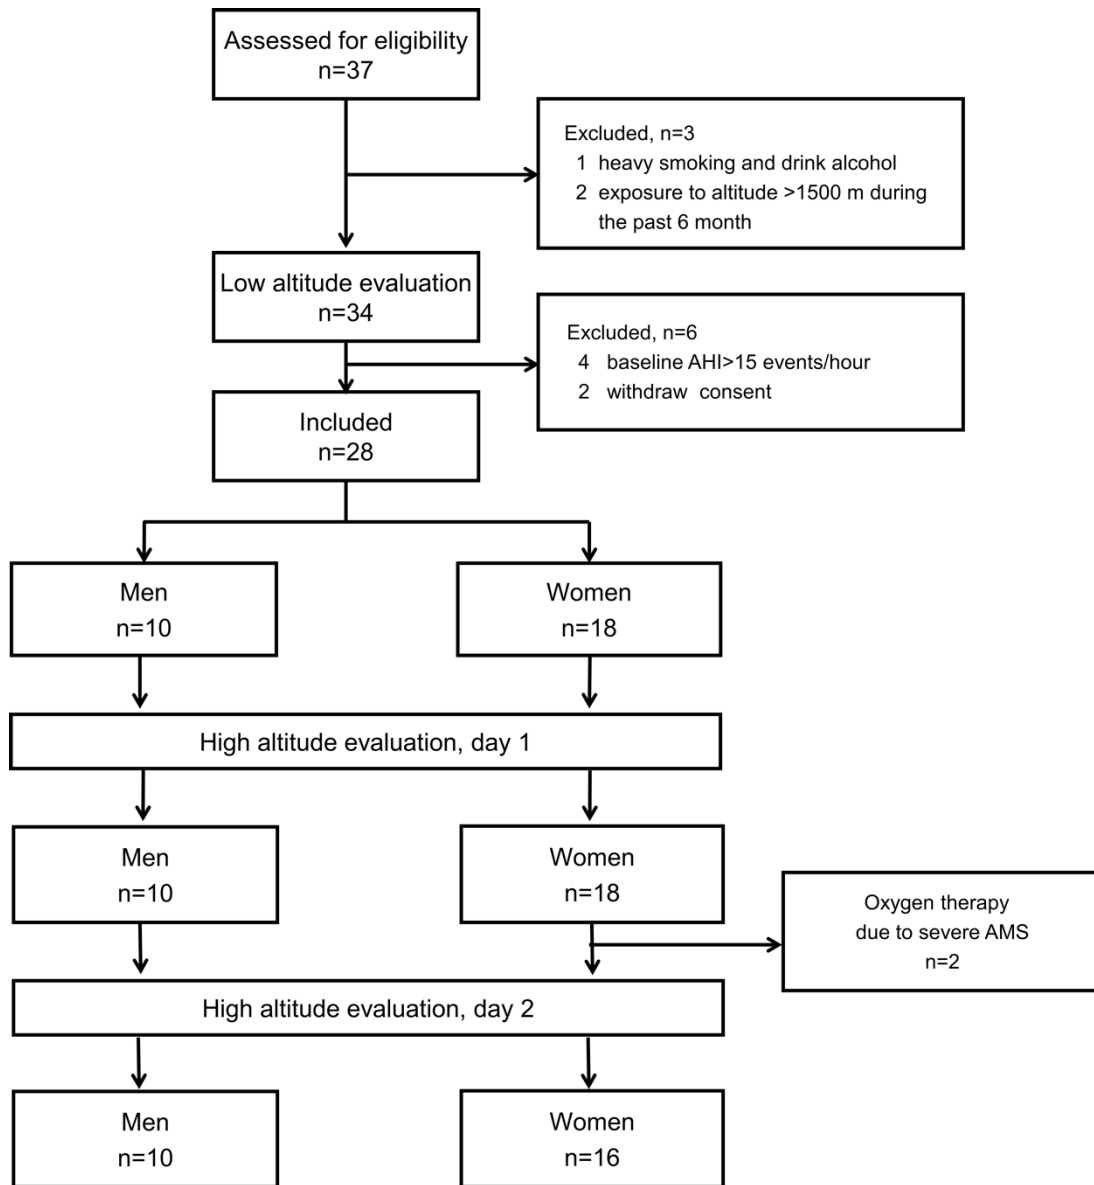

**Figure S1. Flowchart.**

**Low altitude evaluations were performed at 500 m; high altitude evaluations at 3270 m.**

**AHI, apnea hypopnea index; AMS, acute mountain sickness**

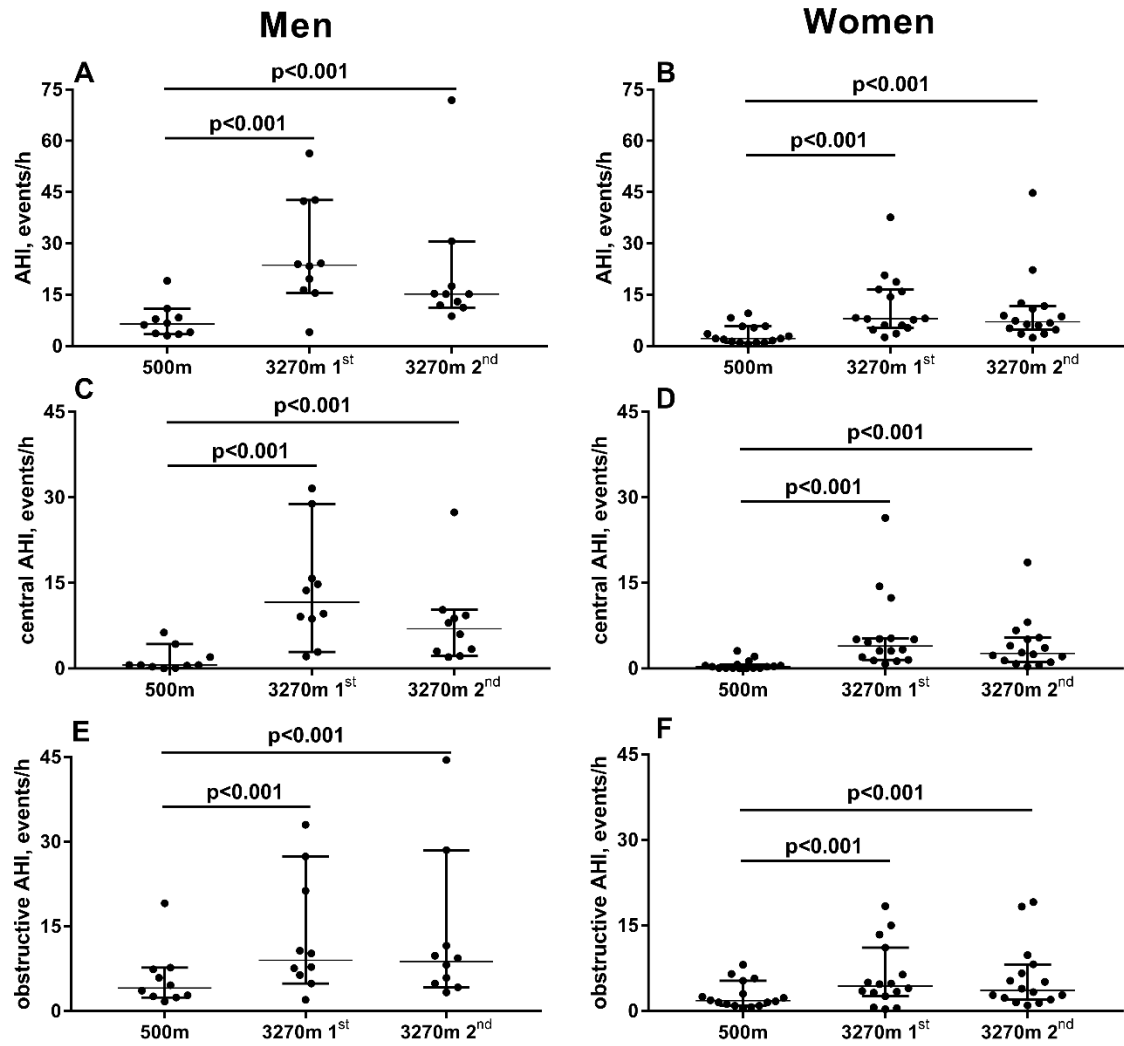

**Figure S2 Individual values in total AHI (Panel A and B), central AHI (Panel C and D) and obstructive AHI (Panel E and F) at 500 m and 3270 m during the first and second night in men and women.**

**AHI, apnea hypopnea index.**
